# Supplementary material
Source: publisher site journal article supplement (https://www.dovepress.com/article/436368)
Supplement: Supplementary file 1 [file get_supplementary_file.php]

**Supplementary material**

Table S1 Clinician’s Erythema Assessment **(**CEA)

| **Grade** | **Score** | **Clinical Description** |
| --- | --- | --- |
| Clear | 0 | Clear skin with no signs of erythema |
| Almost clear | 1 | Almost clear; slight redness |
| Mild | 2 | Mild erythema, definite redness |
| Moderate | 3 | Moderate erythema; marked redness |
| Severe | 4 | Severe erythema; fiery redness |

Table S2 Investigator’s Global Assessment **(**IGA)

| **Grade** | **Score** | **Clinical Description** |
| --- | --- | --- |
| Clear | 0 | No inflammatory lesions present, no erythema |
| Almost clear | 1 | Very few small papules/pustules, very mild erythema present |
| Mild | 2 | Few small papules/pustules, mild erythema |
| Moderate | 3 | Several small or large papules/pustules, moderate erythema |
| Severe | 4 | Numerous small and/or large papules/pustules, severe erythema |

Table S3 The Standard Grading System (SGS)

| Primary features |  |  |  |  |
| --- | --- | --- | --- | --- |
| Flushing (transient erythema) | 口 Absent | 口 Mild | 口 Moderate | 口 Severe |
| Nontransient erythema | 口 Absent | 口 Mild | 口 Moderate | 口 Severe |
| Papules and pustules | 口 Absent | 口 Mild | 口 Moderate | 口 Severe |
| Telangiectasia | 口 Absent | 口 Mild | 口 Moderate | 口 Severe |
| Secondary featues |  |  |  |  |
| Burning or stinging | 口 Absent | 口 Mild | 口 Moderate | 口 Severe |
| Plaques | 口 Absent | 口 Mild | 口 Moderate | 口 Severe |
| Dry appearance | 口 Absent | 口 Mild | 口 Moderate | 口 Severe |
| Edema | 口 Absent | 口 Mild | 口 Moderate | 口 Severe |
| If present: | 口 Acute | 口 Chronic |  |  |
| If chronic: | 口 Pitting | 口 Nonpitting |  |  |
| Ocular manifestations | 口 Absent | 口 Mild | 口 Moderate | 口 Severe |
| Peripheral location | 口 Absent | 口 Present |  |  |
| If present: | List location(s) | |  |  |
| Phymatous changes | 口 Absent | 口 Mild | 口 Moderate | 口 Severe |
| Global assessment |  |  |  |  |
| Physician ratings by subtype |  |  |  |  |
| Subtype1: Erythematotelangiectatic | 口 Absent | 口 Mild | 口 Moderate | 口 Severe |
| Subtype2: Papulopustular | 口 Absent | 口 Mild | 口 Moderate | 口 Severe |
| Subtype 3: Phymatous | 口 Absent | 口 Mild | 口 Moderate | 口 Severe |
| Subtype 4: Ocular | 口 Absent | 口 Mild | 口 Moderate | 口 Severe |
| Patient’s global assessment | 口 Absent | 口 Mild | 口 Moderate | 口 Severe |
